# Supplementary material for: Fucoidan Inhibition of Osteosarcoma Cells is Species and Molecular Weight Dependent
Source: Preprints.org preprint supplement (doi:10.20944/preprints201912.0112.v1), 2019-12-09
Supplement: Supplementary file 1 [file supplementary]

**Supporting Information**

Fucoidan inhibition of osteosarcoma cells is species and molecular weight dependent

Dhanak Gupta1,2, Melissa Silva3, Karolina Radziun1,2,4, Diana C. Martinez1, Christopher Hill5, Julie Marshall2, Vanessa L. Hearnden1, Miguel A. Puertas-Mejia4 and Gwendolen C. Reilly1,2*

1. Department of Materials Science and Engineering, University of Sheffield, UK.
2. 2Insigneo Institute for in Silico Medicine, University of Sheffield, Sheffield, UK.
3. Institute of Chemistry, University of Antioquia, Medellín, Colombia.
4. Cell Bank, Department of Cell Biology, Faculty of Biochemistry, Biophysics and Biotechnology, Jagiellonian University, Krakow, Poland.
5. Department of Biomedical Science, University of Sheffield, Sheffield, UK.

*****Correspondence: Department of Materials Science and Engineering and INSIGNEO Institute for in silico Medicine, The Pam Liversidge Building (C+04), The Sir Robert Hadfield Building, Mappin Street, Sheffield, S1 3JD, UK. E-mail: [g.reilly@sheffield.ac.uk](mailto:g.reilly@sheffield.ac.uk)

**Figure S1:** Assessment of MG63 cell morphology by actin staining. A) Mean ± S.D. of MG63 cells with round morphology after seeding in the presence of different doses of fucoidans (n = 6). B) Representative overlay images of actin (red) and DAPI (blue) stained MG63 cells treated with 0, 0.5 and 100 μg/ml of different fucoidan. Scale bar, 500 µm. * p < 0.05, # p < 0.05 relative to respective vehicle controls.

**Figure S2:** Toxicity of crude fucoidan derived from F. vesiculosus on MG63 cells after 1 day of treatment. Presto BlueTM assay for cell metabolic activity and Pico Green assay for DNA content measurements were performed (n = 4). Scale bar, 200 µm. Mean ± S.D. values are shown. # p < 0.05 relative to vehicle control.

**Figure S3:** Mean ± S.D. of viable, early apoptotic, late apoptotic and dead MG63 cells as seen through Annexin V/PI staining on day 3 of treatment with different fucoidans. * p < 0.05, # p < 0.05 relative to respective vehicle controls.
